# Supplementary material for: Analysis of molecular mechanisms of 5-fluorouracil-induced steatosis and inflammation in vitro and in mice
Source: PubMed Central journal article supplement (PMC5355077; doi:10.18632/oncotarget.14371), 2016-12-30
Supplement: oncotarget-08-13059-s001.pdf [file oncotarget-08-13059-s001.pdf]

## Analysis of molecular mechanisms of 5-fluorouracil-induced steatosis and inflammation *in vitro* and in mice

### SUPPLEMENTARY FIGURES

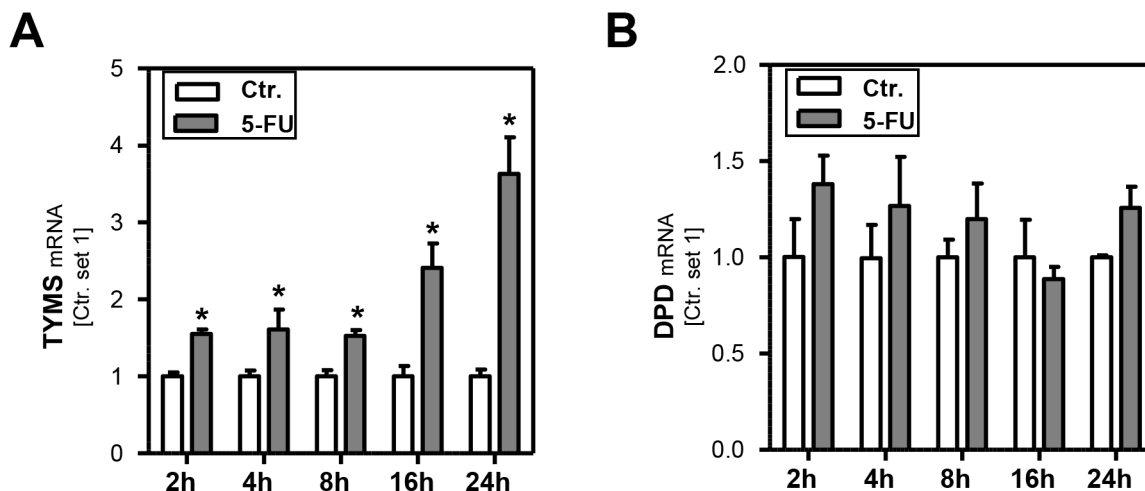

**Supplementary Figure 1: Effect of 5-FU on expression of metabolizing enzymes.** HepG2 cells were incubated with 5-FU (200  $\mu$ M) for different times as indicated. Analysis of mRNA levels of **A**. TYMS and **B**. DPD by quantitative RT-PCR (\*:  $p < 0.05$  compared to control).

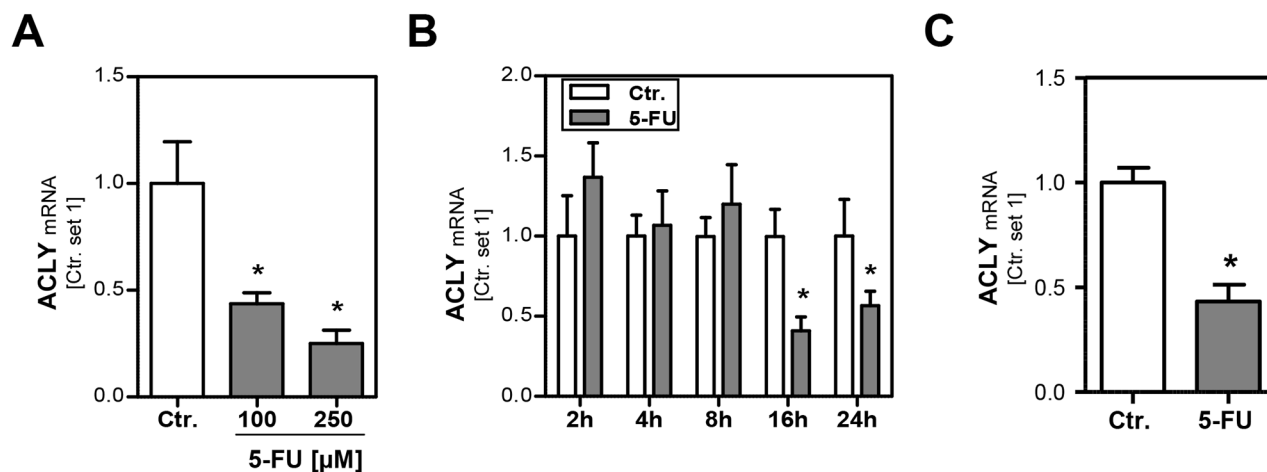

**Supplementary Figure 2: Effect of 5-FU on ACLY expression.** Analysis of mRNA levels of ACLY by quantitative RT-PCR. **A**. HepG2 cells were incubated with 5-FU for 24h. **B**. HepG2 cells were incubated with 5-FU (200  $\mu$ M) for different times as indicated. **C**. Primary human hepatocytes were incubated with 5-FU (500  $\mu$ M) for 24 h (\*:  $p < 0.05$  compared to control).

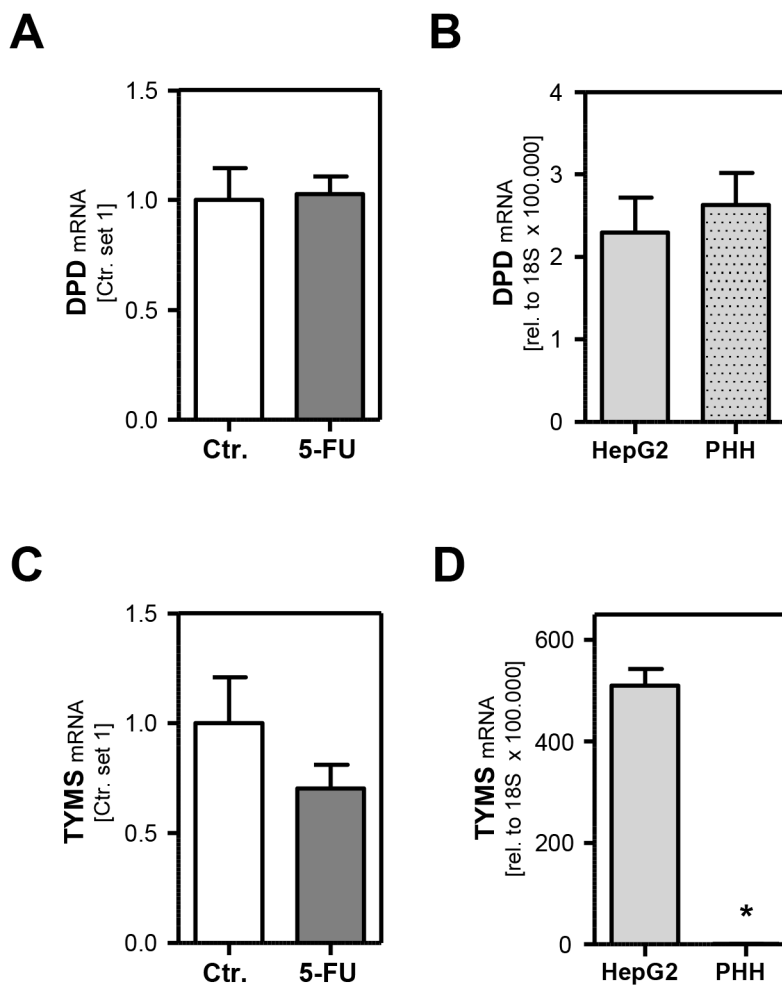

**Supplementary Figure 3: Effect of 5-FU on DPD and TYMS expression in primary human hepatocytes and comparison of expression levels with HepG2 cells.** PHH were incubated with 5-FU (500  $\mu$ M) for 24h. Analysis of mRNA levels of **A.** DPD and **C.** TYMS by quantitative RT-PCR. Comparison of expression levels of **B.** DPD and **D.** TYMS relative to 18S mRNA in untreated HepG2 cells versus untreated PHH. (\*:  $p < 0.05$  compared to HepG2).

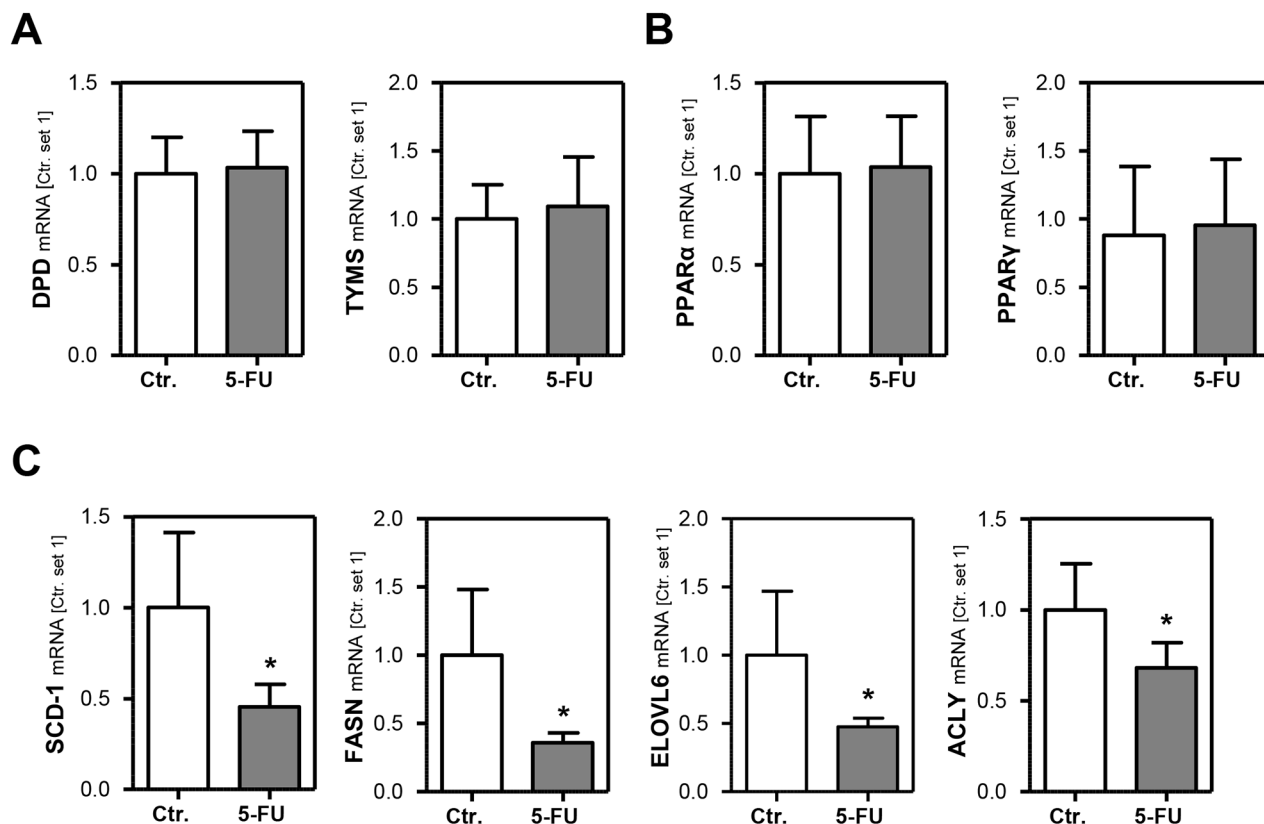

**Supplementary Figure 4: Effect of 5-FU on 5-FU-metabolizing enzymes and de novo-lipogenesis in mice.** Mice were intraperitoneally injected with a single dose 5-FU (200 mg/kg) and liver tissue samples were collected 24 h after injection. Control mice were injected with solvent isotonic saline solution. Analysis of mRNA levels of **A.** DPD and TYMS, **B.** PPAR $\alpha$  and PPAR $\gamma$  and **C.** FASN, SCD-1, ELOVL6 and ACLY by quantitative RT-PCR (\*:  $p < 0.05$  compared to control).

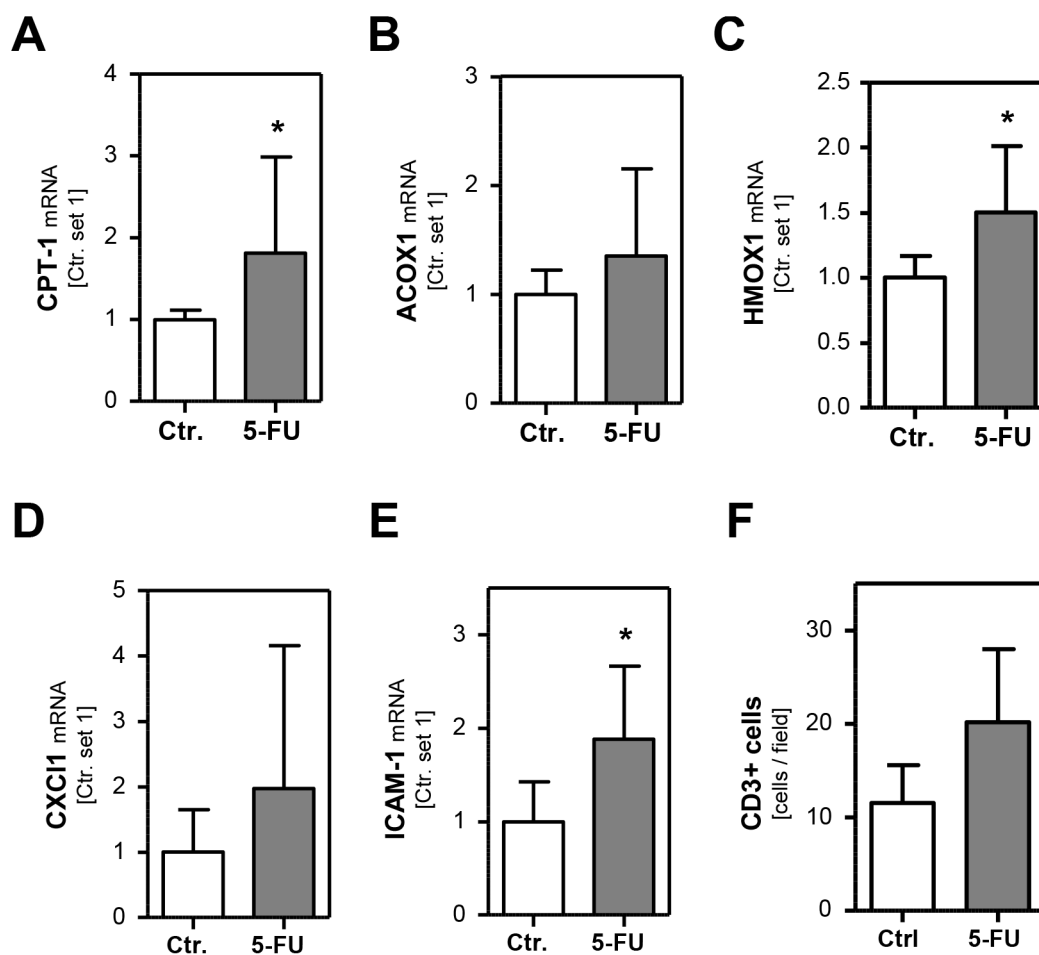

**Supplementary Figure 5: Effect of 5-FU on hepatic  $\beta$ -oxidation, oxidative stress and inflammation in mice.** Mice were intraperitoneally injected with a single dose 5-FU (200 mg/kg) and liver tissue samples were collected 12 h after injection. Control mice were injected with solvent isotonic saline solution. Analysis of mRNA levels of **A.** CPT-1, **B.** ACOX1, **C.** HMOX1, **D.** CXCL1 and **E.** ICAM-1 by quantitative RT-PCR (\*:  $p < 0.05$  compared to control). **F.** Quantification of CD3-positive cells.
